# Supplementary material for: Insight into the oxidase-mimicking activity enhancement of MnO 2 nanozymes by Co ion-doping for colorimetric sensor assays
Source: Royal Society of Chemistry journal article supplement (doi:10.1039/d5ra03755g), 2025-01-01
Supplement: d5ra03755g1.pdf [file d5ra03755g1.pdf]

## **An insight into the oxidase-mimicking activity enhancement of MnO<sub>2</sub> nanozymes by Co ion-doping for colorimetric sensor assays**

*Thi-Hien Pham<sup>a</sup>, Xuan-Dinh Ngo<sup>a</sup>, Nguyen Van Tuyen<sup>b</sup>, Chu Xuan Quang<sup>b</sup>, De Pham-Cong<sup>c</sup>,  
Van Tan Tran<sup>d,\*</sup>, Linh Nguyen Pham Duy<sup>e</sup>, Van-Tuan Hoang<sup>a,\*</sup>, Anh-Tuan Le<sup>a,\*</sup>*

<sup>a</sup>Phenikaa University Nano Institute (PHENA), Phenikaa University, Hanoi 12116, Vietnam.

<sup>b</sup>Center for Advanced Materials and Environmental Technology, National Center for Technological Progress, Hanoi 12116, Vietnam

<sup>c</sup>Department of Nanoenergy Engineering and College of Nanoscience and Nanotechnology, Pusan National University, Busan 46241, Republic of Korea

<sup>d</sup>Faculty of Biotechnology, Chemical and Environmental Engineering (BCEE), Phenikaa University, Hanoi 12116, Vietnam

<sup>e</sup>Department of Applied Chemical Materials, School of Material Science and Engineering, Hanoi University of Science and Technology

\*Email address: [tuan.hoangvan@phenikaa-uni.edu.vn](mailto:tuan.hoangvan@phenikaa-uni.edu.vn) (V. T. Hoang); [tan.tranvan@phenikaa-uni.edu.vn](mailto:tan.tranvan@phenikaa-uni.edu.vn) (V. T. Tran); [tuan.leanh@phenikaa-uni.edu.vn](mailto:tuan.leanh@phenikaa-uni.edu.vn) (A. T. Le)

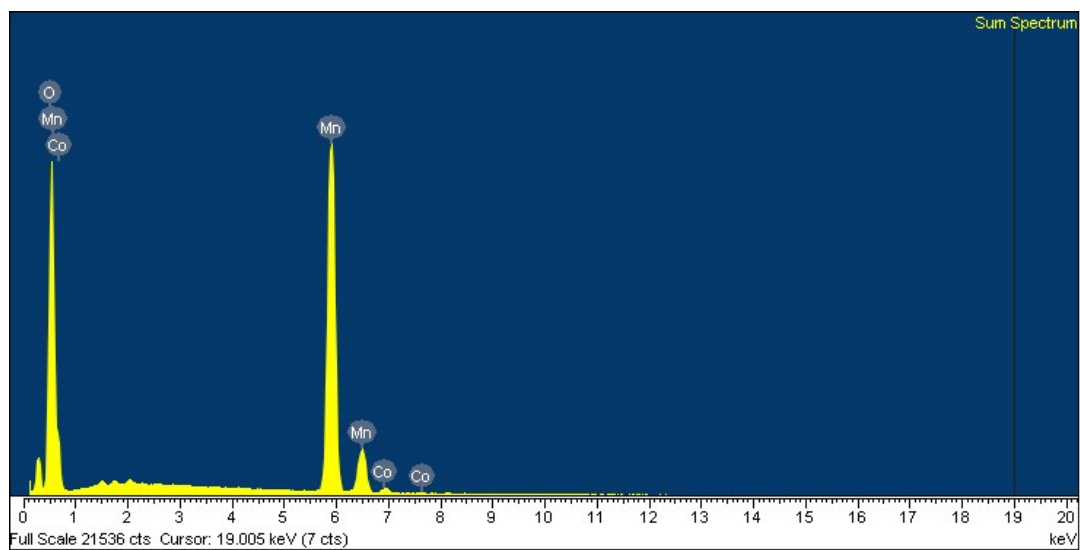

Figure S1. EDS spectrum of Co-MnO<sub>2</sub>.

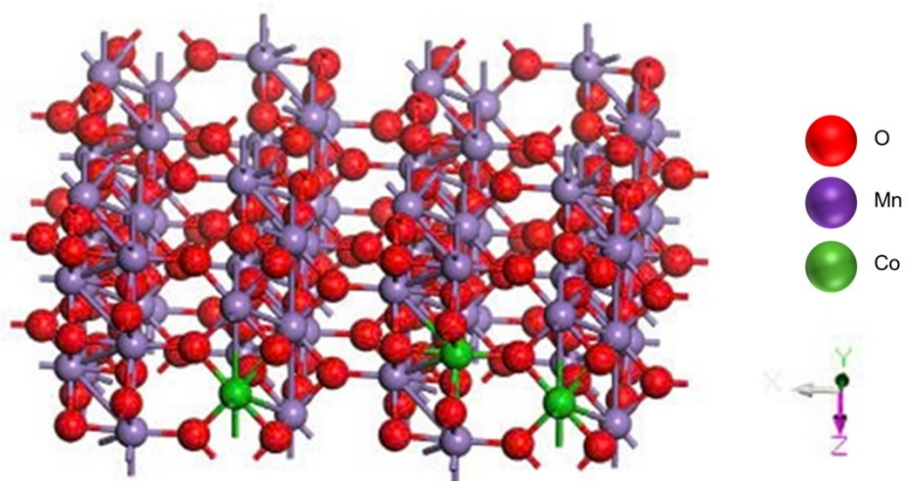

Figure S2. Simulated structure of Co-MnO<sub>2</sub> based on XRD data.

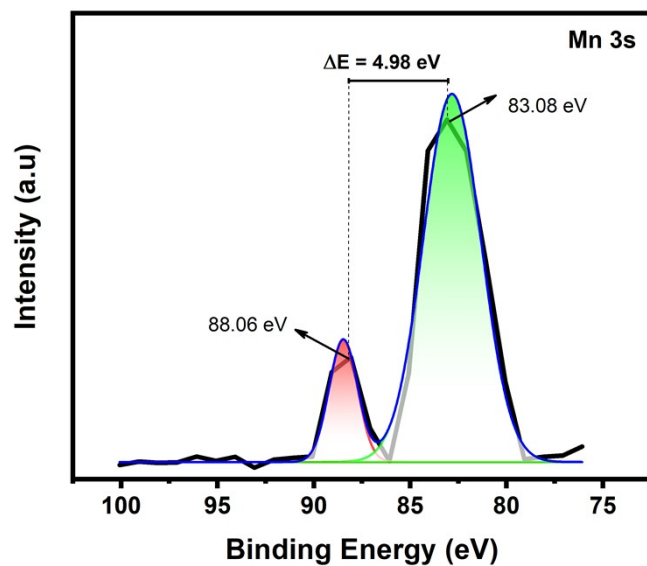

Figure S3. The high-resolution Mn 3s spectrum of Co-MnO<sub>2</sub>.

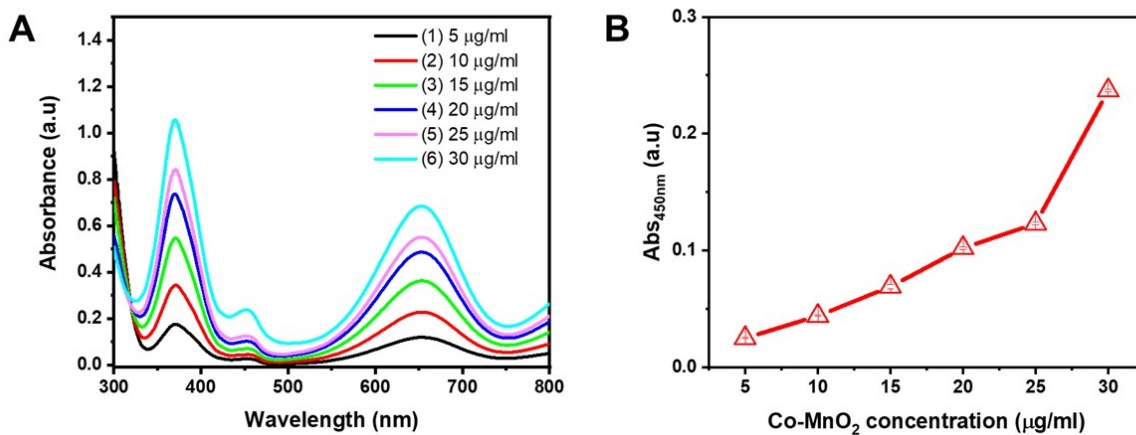

Figure S4. Absorption spectra of various concentrations of Co-MnO<sub>2</sub> and dependence of absorption intensity at 450 nm on Co-MnO<sub>2</sub> concentration.

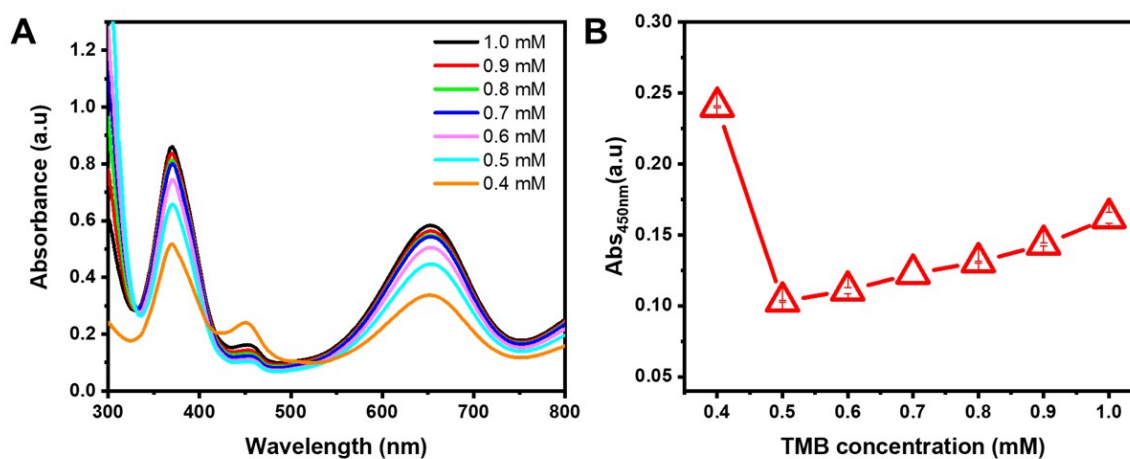

Figure S5. Absorption spectra of various concentrations of TMB and dependence of absorption intensity at 450 nm on TMB concentration.

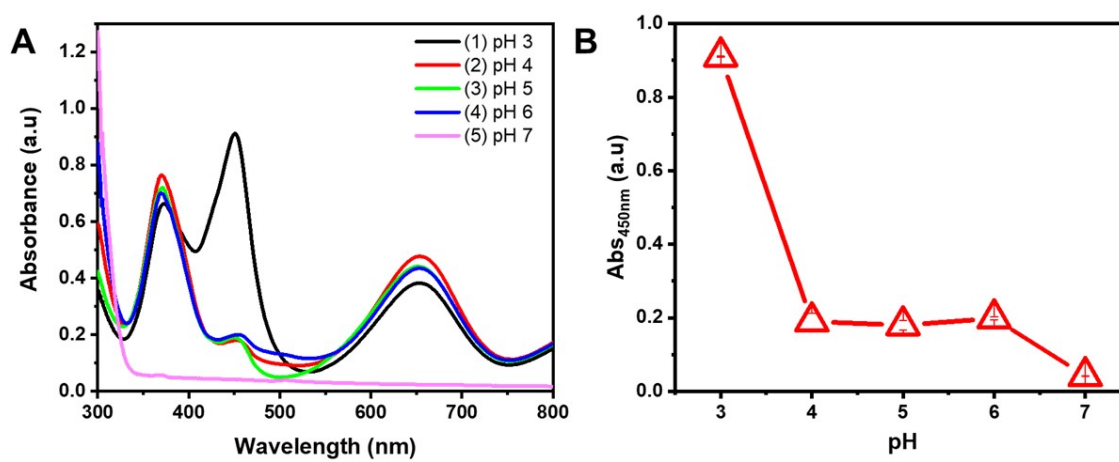

Figure S6. Absorption spectra of various pH of buffer solution and dependence of absorption intensity at 450 nm on pH.

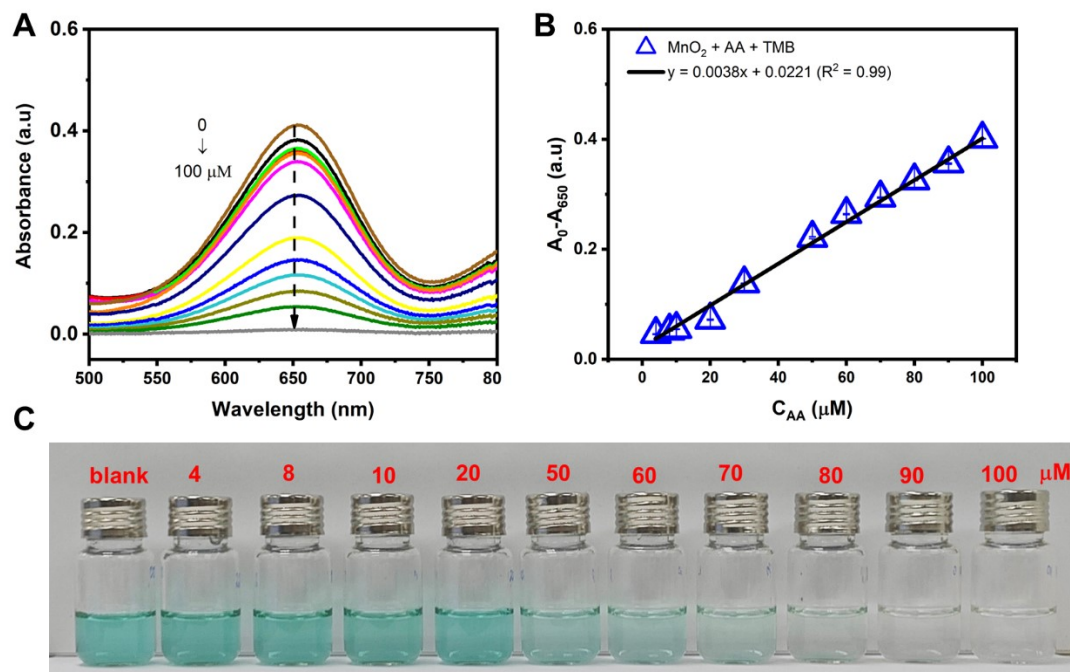

Figure S7. (A) UV-Vis spectra of  $\text{MnO}_2$  + TMB system and (B) Colorimetric detection linear correlation for AA concentrations ranging from 4 to 100  $\mu\text{M}$ . (C) Photo of vials containing  $\text{MnO}_2$  + TMB system with different AA concentrations.

Table S1: Comparison of the kinetic parameters for oxidation reaction catalyzed of  $\text{MnO}_2/\text{Co}$ -based nanozymes with TMB substance.

| Nanozyme                                       | $K_m$ (mM) | $V_{\max}$ ( $\text{Ms}^{-1}$ ) | Ref.      |
|------------------------------------------------|------------|---------------------------------|-----------|
| $\text{MnO}_2@\text{G}$                        | 0.026      | $2.52 \times 10^{-8}$           | [1]       |
| $\text{Pt}@\text{MnO}_2$                       | 0.015      | $1.56 \times 10^{-6}$           | [2]       |
| $\text{Co(BDC)TED}_{0.5}@\text{24h}$           | 0.26       | $3.57 \times 10^{-8}$           | [3]       |
| Co NPs                                         | 1.14       | $9.98 \times 10^{-8}$           | [4]       |
| $\text{Fe}_{0.5}\text{Co}_{0.5}$ nanoparticles | 1.79       | $45.6 \times 10^{-8}$           | [4]       |
| $\text{MnO}_2$                                 | 1.81       | $3.88 \times 10^{-6}$           | This work |
| Co- $\text{MnO}_2$                             | 1.17       | $4.69 \times 10^{-6}$           | This work |

## Reference

- [1] Y. Liu *et al.*, “In situ green synthesis of the nanocomposites of MnO<sub>2</sub>/graphene as an oxidase mimic for sensitive colorimetric and electrochemical dual-mode biosensing,” *RSC Adv.*, vol. 13, no. 44, pp. 31067–31076, Oct. 2023, doi: 10.1039/D3RA05879D.
- [2] J. Liu, L. Meng, Z. Fei, P. J. Dyson, and L. Zhang, “On the origin of the synergy between the Pt nanoparticles and MnO<sub>2</sub> nanosheets in Wonton-like 3D nanozyme oxidase mimics,” *Biosens. Bioelectron.*, vol. 121, pp. 159–165, Dec. 2018, doi: 10.1016/J.BIOS.2018.08.004.
- [3] Z. Deng *et al.*, “A nanozyme-like colorimetric sensing strategy based on persulfate activation on Co-based metal–organic frameworks,” *Chem. Commun.*, vol. 59, no. 22, pp. 3277–3280, Mar. 2023, doi: 10.1039/D3CC00249G.
- [4] Y. Chen, H. Cao, W. Shi, H. Liu, and Y. Huang, “Fe–Co bimetallic alloy nanoparticles as a highly active peroxidase mimetic and its application in biosensing,” *Chem. Commun.*, vol. 49, no. 44, pp. 5013–5015, May 2013, doi: 10.1039/C3CC41569D.
